# Supplementary material for: Dose–Response Association of Metformin with Parkinson’s Disease Odds in Type 2 Diabetes Mellitus
Source: MDPI journal article supplement (doi:10.3390/pharmaceutics14050946), 2022-04-27
Supplement: s1 [file s1]

**Supplement Table S1.** The distribution of incident Parkinson's disease in new-onset diabetes mellitus patients.

| Variables                  | Three-year follow-up |       |       |      |         | Five-year follow-up |       |       |      |         |
|----------------------------|----------------------|-------|-------|------|---------|---------------------|-------|-------|------|---------|
|                            | Without              |       | With  |      | p-value | Without             |       | With  |      | p-value |
|                            | N                    | %     | N     | %    |         | N                   | %     | N     | %    |         |
| Total                      | 738,940              | 99.46 | 3,977 | 0.54 |         | 734,429             | 98.86 | 8,488 | 1.14 |         |
| cDDD of metformin use      |                      |       |       |      | <0.001  |                     |       |       |      | <0.001  |
| Non-users                  | 355,978              | 99.38 | 2,223 | 0.62 |         | 353,617             | 98.72 | 4,584 | 1.28 |         |
| DDD <300                   | 377,627              | 99.54 | 1,728 | 0.46 |         | 375,499             | 98.98 | 3,856 | 1.02 |         |
| DDD 300-500                | 5,102                | 99.55 | 23    | 0.45 |         | 5,080               | 99.12 | 45    | 0.88 |         |
| DDD 500+                   | 233                  | 98.73 | 3     | 1.27 |         | 233                 | 98.73 | 3     | 1.27 |         |
| Intensity of metformin use |                      |       |       |      | <0.001  |                     |       |       |      | <0.001  |
| Non-users                  | 355,978              | 99.38 | 2,223 | 0.62 |         | 353,617             | 98.72 | 4,584 | 1.28 |         |
| <10                        | 277,169              | 99.54 | 1,292 | 0.46 |         | 275,571             | 98.96 | 2,890 | 1.04 |         |
| 10~25                      | 100,458              | 99.57 | 436   | 0.43 |         | 99,928              | 99.04 | 966   | 0.96 |         |
| 25+                        | 5,335                | 99.52 | 26    | 0.48 |         | 5,313               | 99.10 | 48    | 0.90 |         |
| Gender                     |                      |       |       |      | 0.298   |                     |       |       |      | 0.033   |
| Female                     | 379,987              | 99.46 | 2,078 | 0.54 |         | 377,602             | 98.83 | 4,463 | 1.17 |         |
| Male                       | 358,953              | 99.47 | 1,899 | 0.53 |         | 356,827             | 98.88 | 4,025 | 1.12 |         |
| Age (year)                 |                      |       |       |      | <0.001  |                     |       |       |      | <0.001  |
| 50-64                      | 474,691              | 99.80 | 940   | 0.20 |         | 473,470             | 99.55 | 2,161 | 0.45 |         |
| 65-74                      | 182,184              | 99.12 | 1,617 | 0.88 |         | 180,241             | 98.06 | 3,560 | 1.94 |         |
| 75+                        | 82,065               | 98.30 | 1,420 | 1.70 |         | 80,718              | 96.69 | 2,767 | 3.31 |         |
| Income level               |                      |       |       |      | <0.001  |                     |       |       |      | <0.001  |
| ≤21,000                    | 382,739              | 99.36 | 2,475 | 0.64 |         | 379,975             | 98.64 | 5,239 | 1.36 |         |
| 21,001-33,000              | 175,498              | 99.54 | 803   | 0.46 |         | 174,573             | 99.02 | 1,728 | 0.98 |         |
| ≥33,001                    | 180,703              | 99.61 | 699   | 0.39 |         | 179,881             | 99.16 | 1,521 | 0.84 |         |
| Urbanization               |                      |       |       |      | <0.001  |                     |       |       |      | <0.001  |
| Level 1                    | 204,200              | 99.55 | 919   | 0.45 |         | 203,026             | 98.98 | 2,093 | 1.02 |         |
| Level 2                    | 238,959              | 99.51 | 1,167 | 0.49 |         | 237,660             | 98.97 | 2,466 | 1.03 |         |
| Level 3                    | 114,722              | 99.48 | 599   | 0.52 |         | 114,024             | 98.88 | 1,297 | 1.12 |         |
| Level 4                    | 103,634              | 99.32 | 712   | 0.68 |         | 102,893             | 98.61 | 1,453 | 1.39 |         |
| Level 5                    | 17,385               | 99.04 | 169   | 0.96 |         | 17,246              | 98.25 | 308   | 1.75 |         |
| Level 6                    | 31,479               | 99.27 | 230   | 0.73 |         | 31,227              | 98.48 | 482   | 1.52 |         |
| Level 7                    | 28,561               | 99.37 | 181   | 0.63 |         | 28,353              | 98.65 | 389   | 1.35 |         |
| DCSI score                 |                      |       |       |      | <0.001  |                     |       |       |      | <0.001  |
| 0                          | 447,991              | 99.61 | 1,735 | 0.39 |         | 445,837             | 99.14 | 3,889 | 0.86 |         |
| 1                          | 157,729              | 99.44 | 890   | 0.56 |         | 156,649             | 98.76 | 1,970 | 1.24 |         |
| 2+                         | 133,220              | 99.00 | 1,352 | 1.00 |         | 131,943             | 98.05 | 2,629 | 1.95 |         |
| Hypertension               |                      |       |       |      | <0.001  |                     |       |       |      | <0.001  |
| No                         | 405,812              | 99.57 | 1,747 | 0.43 |         | 403,774             | 99.07 | 3,785 | 0.93 |         |
| Yes                        | 333,128              | 99.34 | 2,230 | 0.66 |         | 330,655             | 98.60 | 4,703 | 1.40 |         |
| Hyperlipidemia             |                      |       |       |      | 0.398   |                     |       |       |      | 0.234   |
| No                         | 581,359              | 99.47 | 3,107 | 0.53 |         | 577,833             | 98.87 | 6,633 | 1.13 |         |
| Yes                        | 157,581              | 99.45 | 870   | 0.55 |         | 156,596             | 98.83 | 1,855 | 1.17 |         |
| Hyperuricemia              |                      |       |       |      | 0.049   |                     |       |       |      | 0.147   |
| No                         | 732,538              | 99.47 | 3,931 | 0.53 |         | 728,067             | 98.86 | 8,402 | 1.14 |         |
| Yes                        | 6,402                | 99.29 | 46    | 0.71 |         | 6,362               | 98.67 | 86    | 1.33 |         |
| Cerebrovascular disease    |                      |       |       |      | <0.001  |                     |       |       |      | <0.001  |
| No                         | 701,014              | 99.52 | 3,398 | 0.48 |         | 697,037             | 98.95 | 7,375 | 1.05 |         |
| Yes                        | 37,926               | 98.50 | 579   | 1.50 |         | 37,392              | 97.11 | 1,113 | 2.89 |         |
| Coronary artery disease    |                      |       |       |      | <0.001  |                     |       |       |      | <0.001  |
| No                         | 674,832              | 99.50 | 3,376 | 0.50 |         | 670,949             | 98.93 | 7,259 | 1.07 |         |

|                        |         |       |       |      |        |         |       |       |      |        |
|------------------------|---------|-------|-------|------|--------|---------|-------|-------|------|--------|
| Yes                    | 64,108  | 99.07 | 601   | 0.93 |        | 63,480  | 98.10 | 1,229 | 1.90 |        |
| Arrhythmia             |         |       |       |      | <0.001 |         |       |       |      | <0.001 |
| No                     | 707,402 | 99.48 | 3,683 | 0.52 |        | 703,229 | 98.90 | 7,856 | 1.10 |        |
| Yes                    | 31,538  | 99.08 | 294   | 0.92 |        | 31,200  | 98.01 | 632   | 1.99 |        |
| Heart failure          |         |       |       |      | <0.001 |         |       |       |      | <0.001 |
| No                     | 724,920 | 99.47 | 3,831 | 0.53 |        | 720,558 | 98.88 | 8,193 | 1.12 |        |
| Yes                    | 14,020  | 98.97 | 146   | 1.03 |        | 13,871  | 97.92 | 295   | 2.08 |        |
| Anxiety                |         |       |       |      | <0.001 |         |       |       |      | <0.001 |
| No                     | 665,924 | 99.52 | 3,208 | 0.48 |        | 662,215 | 98.97 | 6,917 | 1.03 |        |
| Yes                    | 73,016  | 98.96 | 769   | 1.04 |        | 72,214  | 97.87 | 1,571 | 2.13 |        |
| Depression             |         |       |       |      | <0.001 |         |       |       |      | <0.001 |
| No                     | 735,102 | 99.47 | 3,914 | 0.53 |        | 730,640 | 98.87 | 8,376 | 1.13 |        |
| Yes                    | 3,838   | 98.39 | 63    | 1.61 |        | 3,789   | 97.13 | 112   | 2.87 |        |
| COPD                   |         |       |       |      | <0.001 |         |       |       |      | <0.001 |
| No                     | 694,342 | 99.49 | 3,527 | 0.51 |        | 690,286 | 98.91 | 7,583 | 1.09 |        |
| Yes                    | 44,598  | 99.00 | 450   | 1.00 |        | 44,143  | 97.99 | 905   | 2.01 |        |
| Chronic kidney disease |         |       |       |      | <0.001 |         |       |       |      | <0.001 |
| No                     | 733,028 | 99.47 | 3,897 | 0.53 |        | 728,574 | 98.87 | 8,351 | 1.13 |        |
| Yes                    | 5,912   | 98.66 | 80    | 1.34 |        | 5,855   | 97.71 | 137   | 2.29 |        |
| Obesity                |         |       |       |      | 0.422  |         |       |       |      | 0.021  |
| No                     | 735,717 | 99.46 | 3,963 | 0.54 |        | 731,215 | 98.86 | 8,465 | 1.14 |        |
| Yes                    | 3,223   | 99.57 | 14    | 0.43 |        | 3,214   | 99.29 | 23    | 0.71 |        |
| Alcoholism             |         |       |       |      | 0.671  |         |       |       |      | 0.994  |
| No                     | 738,504 | 99.46 | 3,974 | 0.54 |        | 733,995 | 98.86 | 8,483 | 1.14 |        |
| Yes                    | 436     | 99.32 | 3     | 0.68 |        | 434     | 98.86 | 5     | 1.14 |        |
